# Supplementary material for: QTL mapping of male sterility and transmission pattern in progeny of Satsuma mandarin
Source: PubMed Central journal article supplement (PMC6049952; doi:10.1371/journal.pone.0200844), 2018-07-17
Supplement: pone.0200844.s004.pdf [file pone.0200844.s004.pdf]

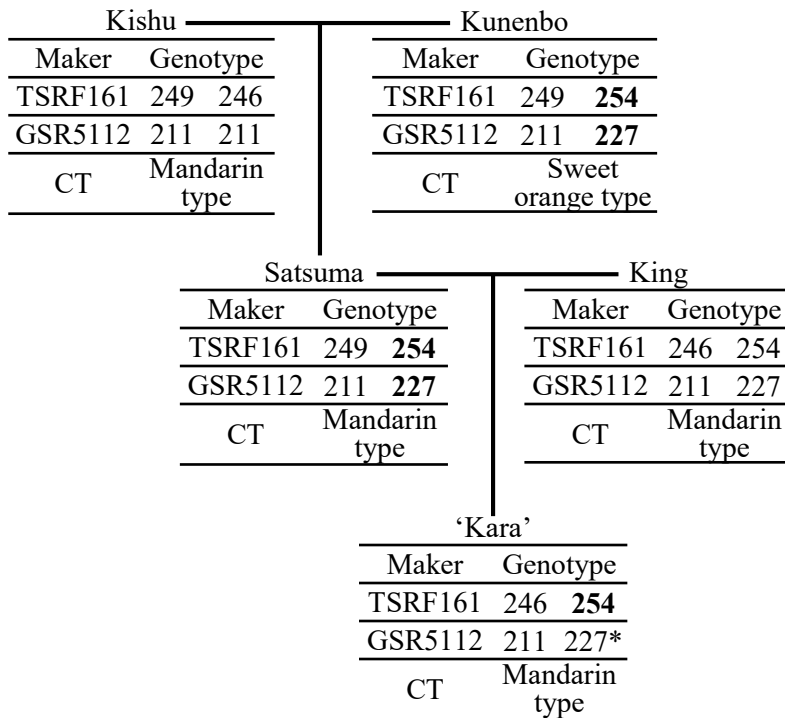

**S4 Fig. Inheritance of the alleles of TSRF161 and GSR5112 linked with *MS-PI* in 'Kara' ancestors.** Genotypes of simple sequence repeat markers and classes of organelle genotype (CT) were sourced from a previous report (Shimizu et al. 2016). The alleles derived from kunenbo are indicated in bold. \*: Allele "227" at GSR5112 could not be estimated because the genotypes at GSR5112 were the same in Satsuma and King. CT: classes of organelle genotype.
